# Supplementary material for: Complete genome sequences of Aeromonas and Pseudomonas phages as a supportive tool for development of antibacterial treatment in aquaculture
Source: Springer Nature journal article supplement (doi:10.1186/s12985-018-1113-5), 2019-01-08

**M 1 2 3 4 5 6 7 8 9 10 11**

10 000 bp  
6 000 bp  
4 000 bp  
3 000 bp  
2 500 bp  
2 000 bp  
1 500 bp  
1 000 bp  
750 bp  
500 bp  
250 bp

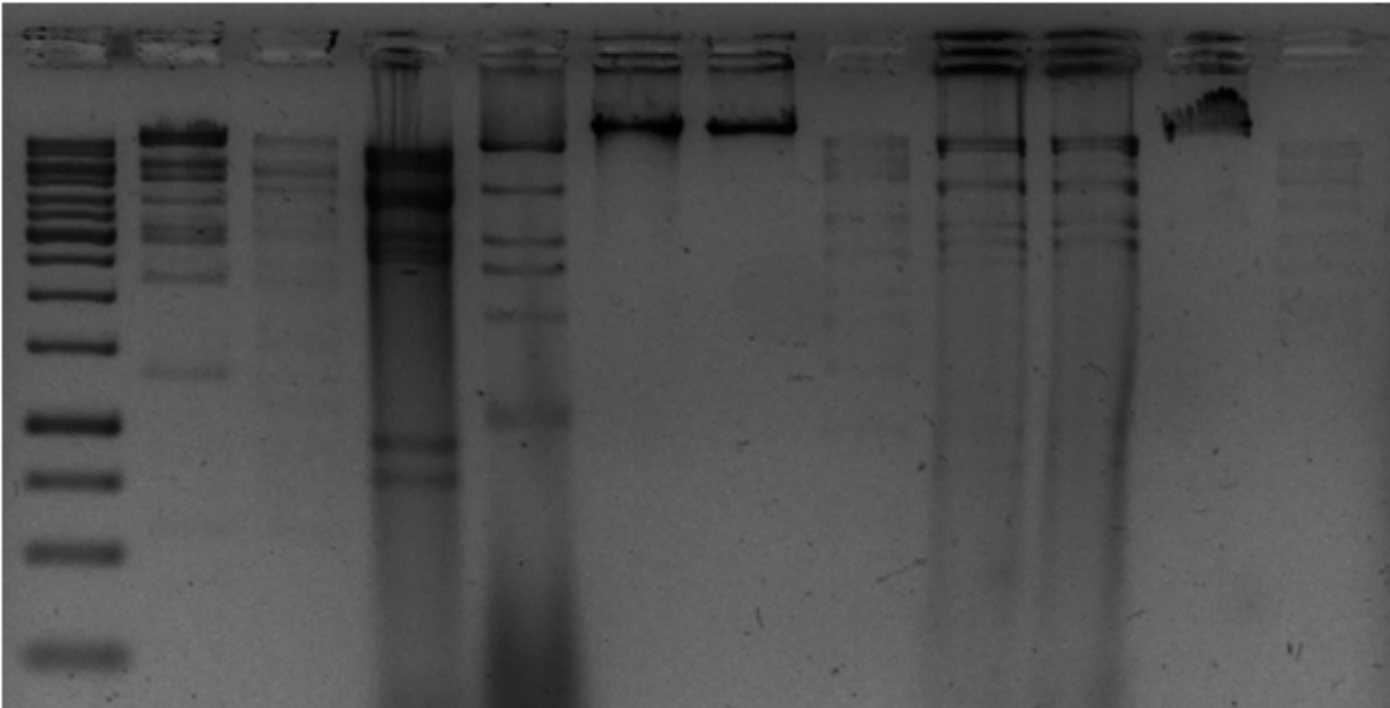

**M 1 2 3 4 5 6 7 8 9 10 11**

10 000 bp  
6 000 bp  
4 000 bp  
3 000 bp  
2 500 bp  
2 000 bp  
1 500 bp  
1 000 bp  
750 bp  
500 bp  
250 bp

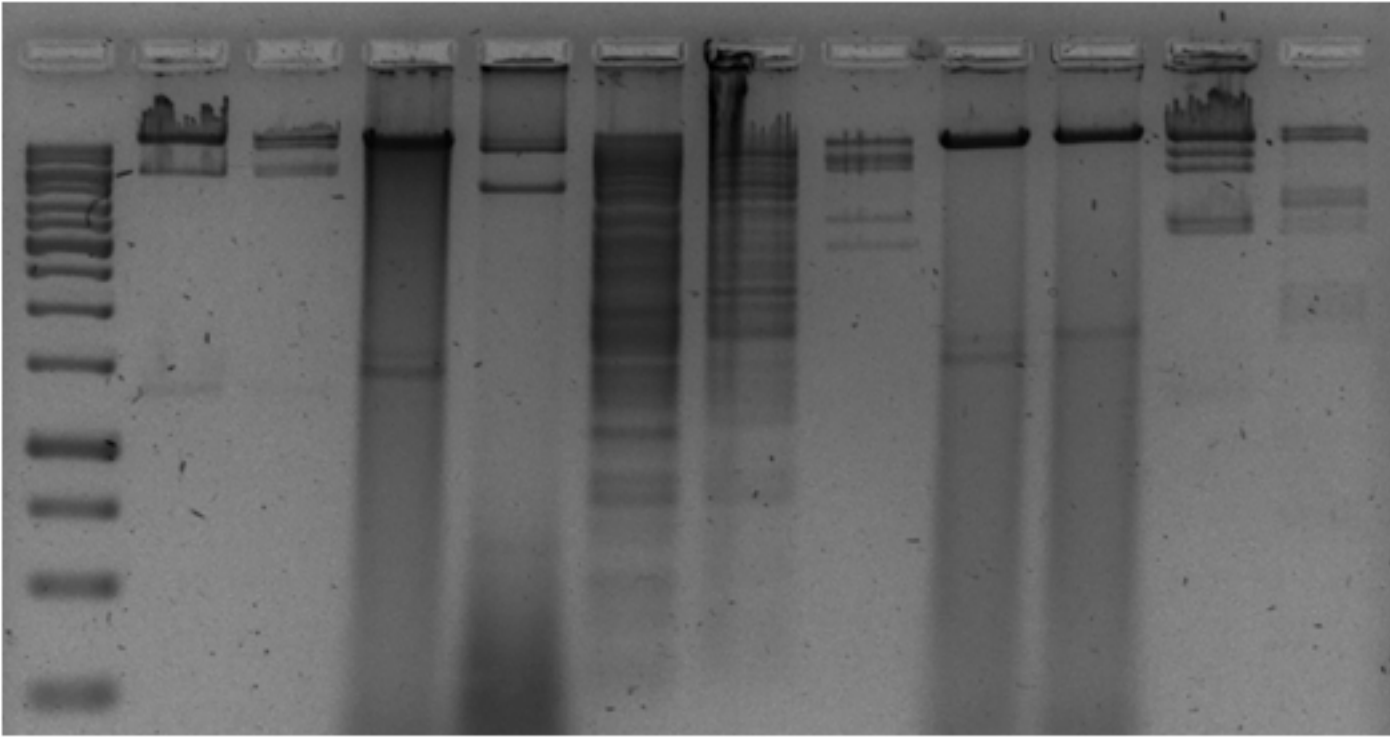

Supplement: MOESM2 [file 16385324]
