# Supplementary material for: Complete genome sequences of Aeromonas and Pseudomonas phages as a supportive tool for development of antibacterial treatment in aquaculture
Source: Springer Nature journal article supplement (doi:10.1186/s12985-018-1113-5), 2019-01-08
Supplement: MOESM3 [file 16385324]

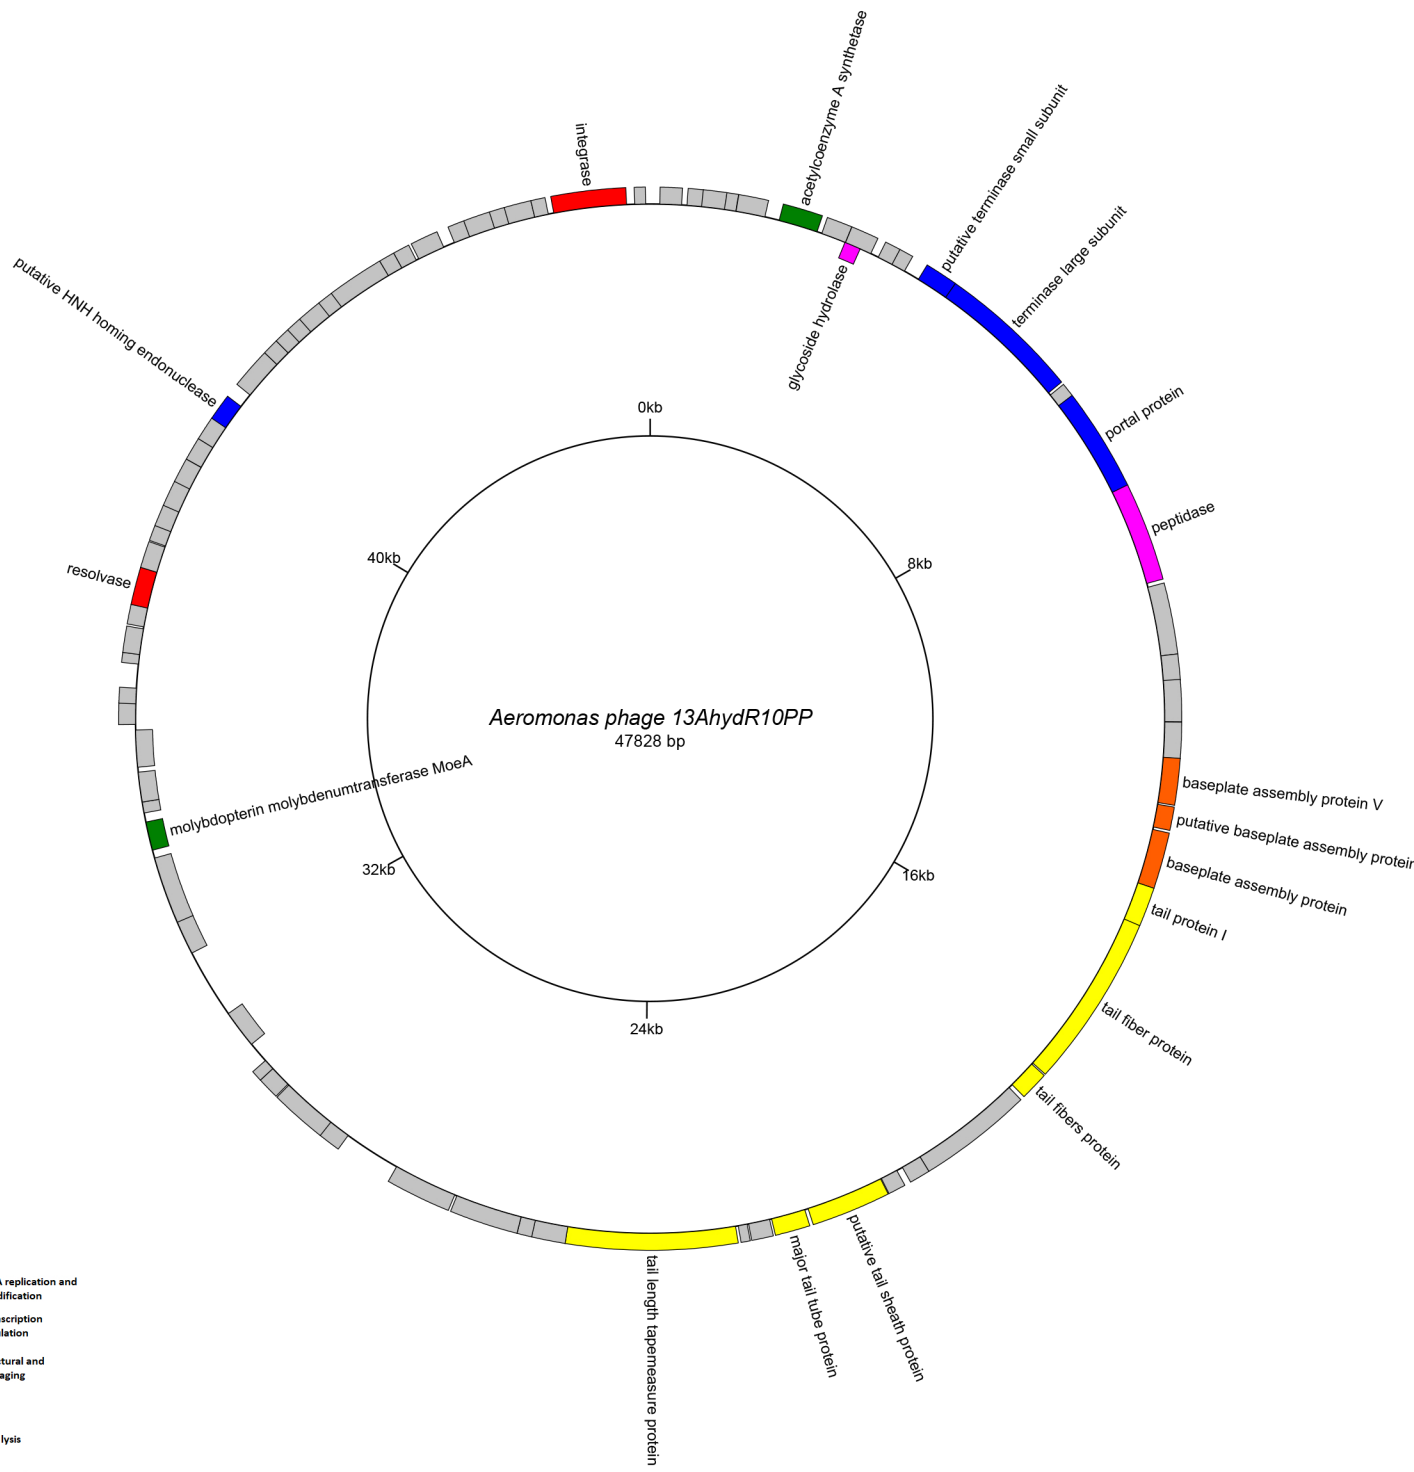

- ➡ DNA replication and modification
- ➡ Transcription regulation
- ➡ Structural and packaging
- ➡ Tail
- ➡ Host lysis
- ➡ Integrase/lysogenic
- ➡ Hypothetical protein
