# Supplementary material for: Complete genome sequences of Aeromonas and Pseudomonas phages as a supportive tool for development of antibacterial treatment in aquaculture
Source: Springer Nature journal article supplement (doi:10.1186/s12985-018-1113-5), 2019-01-08
Supplement: MOESM4 [file 16385324]

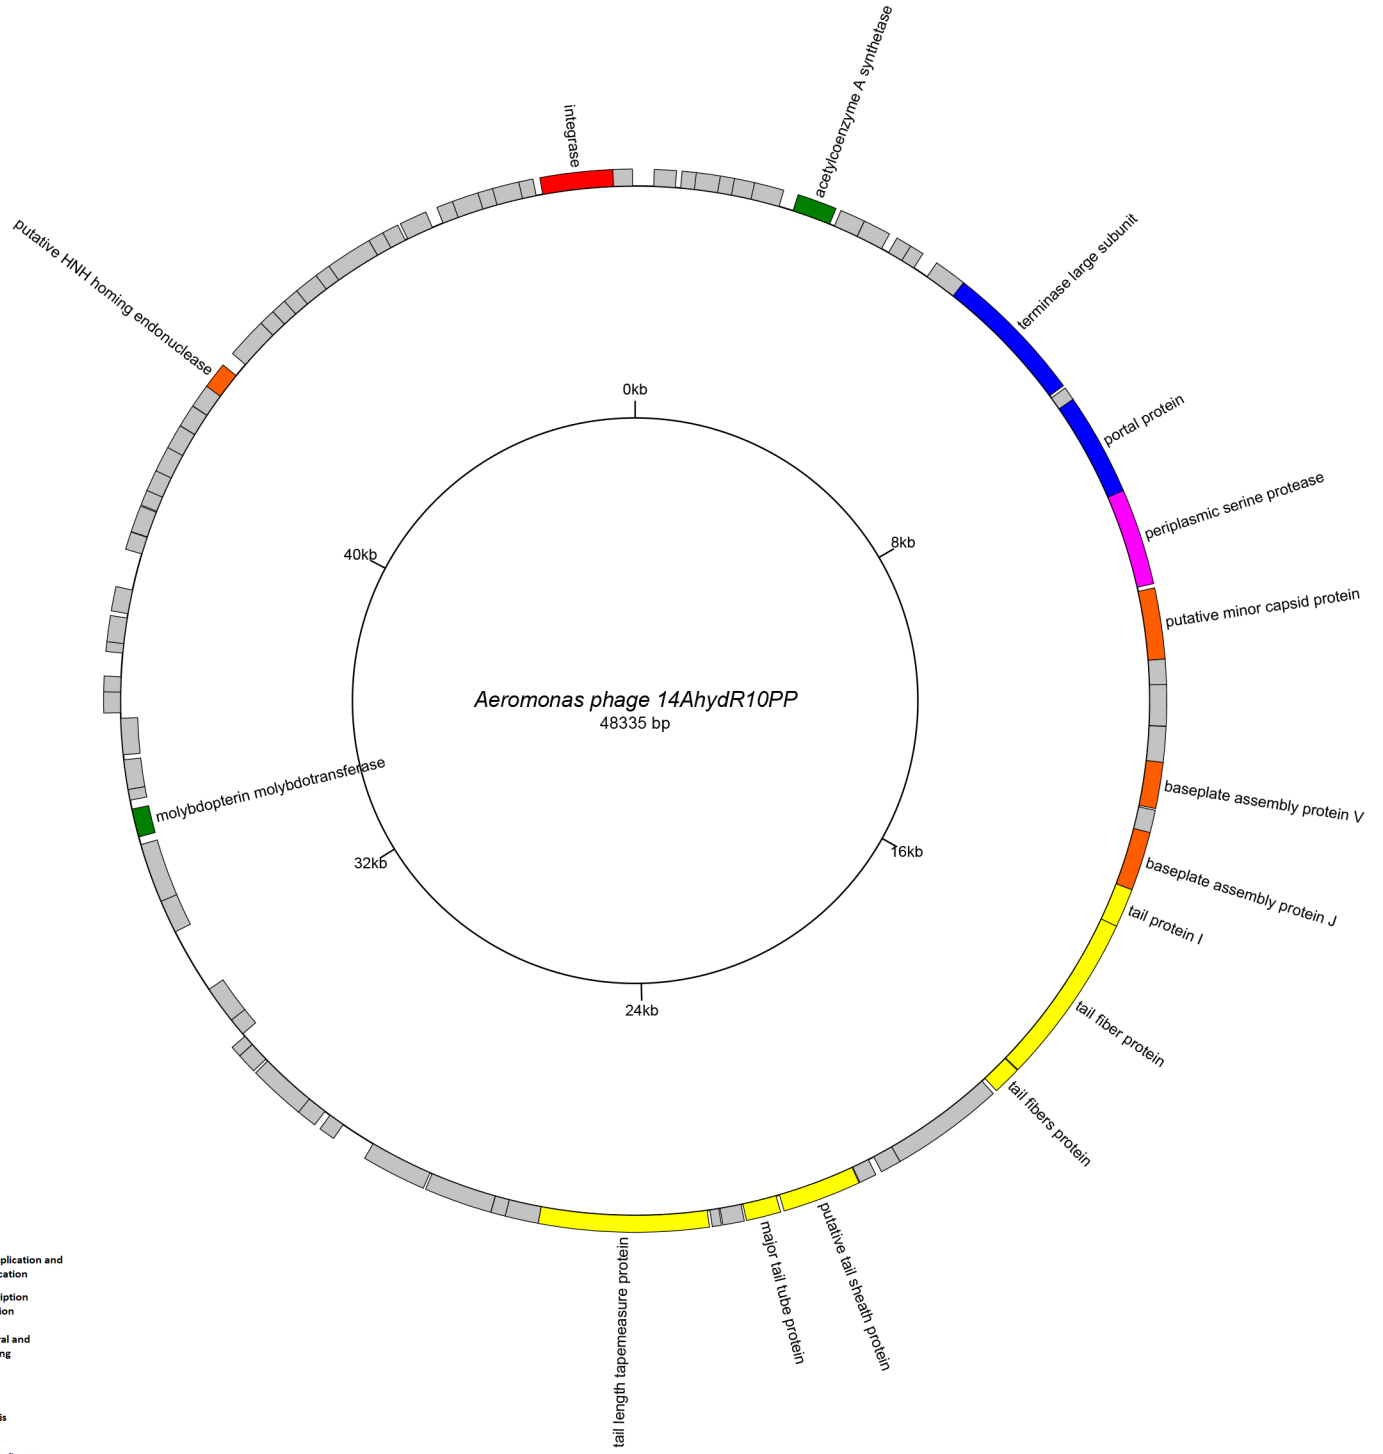

- DNA replication and modification
- Transcription regulation
- Structural and packaging
- Tail
- Host lysis
- Integrase/lysogenic
- Hypothetical protein
