# Supplementary material for: Complete genome sequences of Aeromonas and Pseudomonas phages as a supportive tool for development of antibacterial treatment in aquaculture
Source: Springer Nature journal article supplement (doi:10.1186/s12985-018-1113-5), 2019-01-08
Supplement: MOESM7 [file 16385324]

*Aeromonas* phage 50AhydR13PP  
164983 bp

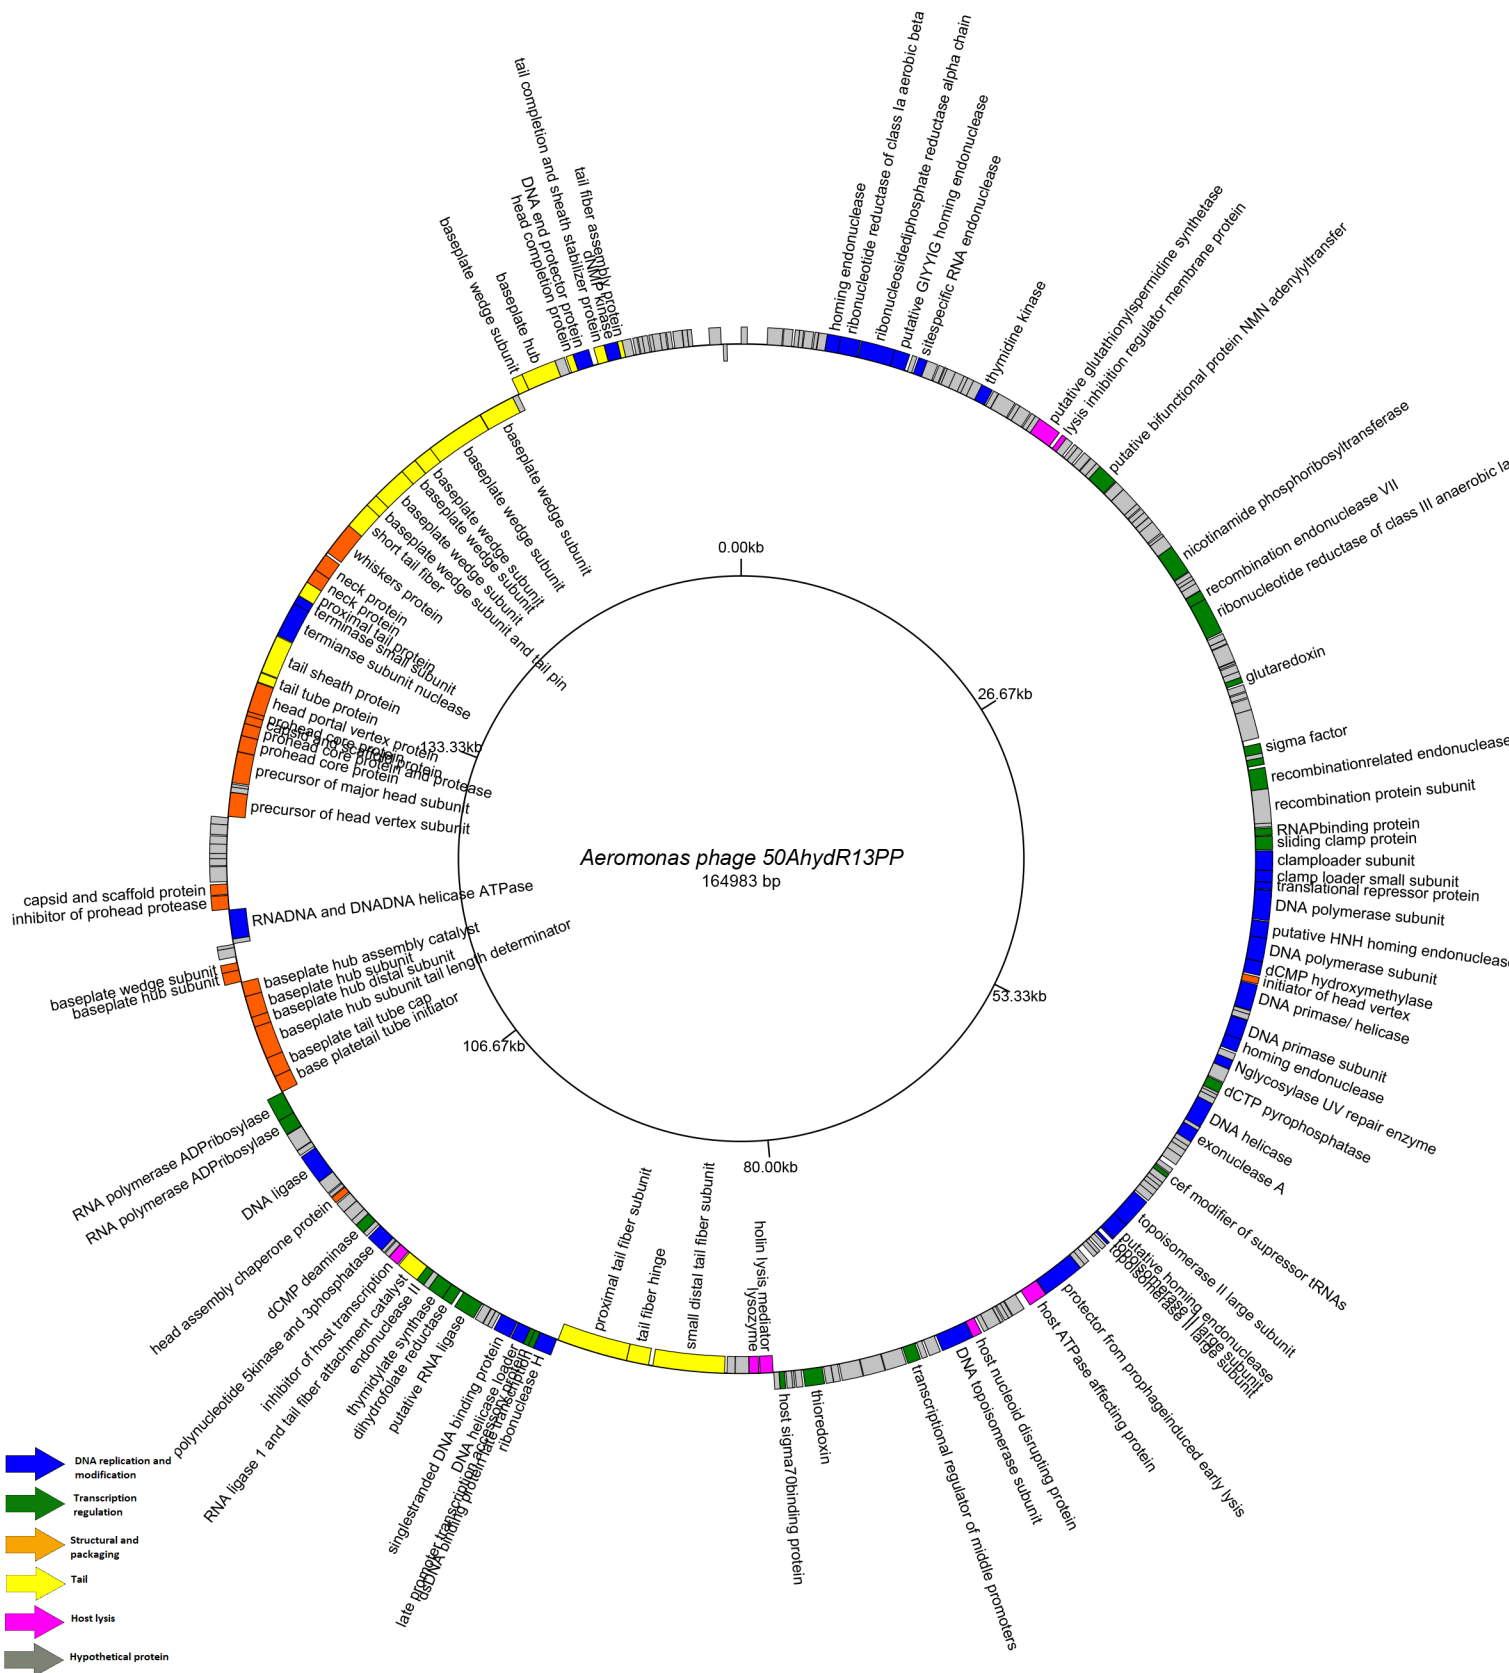

- ▶ DNA replication and modification
- ▶ Transcription regulation
- ▶ Structural and packaging
- ▶ Tail
- ▶ Host lysis
- ▶ Hypothetical protein
