# Supplementary material for: Complete genome sequences of Aeromonas and Pseudomonas phages as a supportive tool for development of antibacterial treatment in aquaculture
Source: Springer Nature journal article supplement (doi:10.1186/s12985-018-1113-5), 2019-01-08
Supplement: MOESM12 [file 16385324]

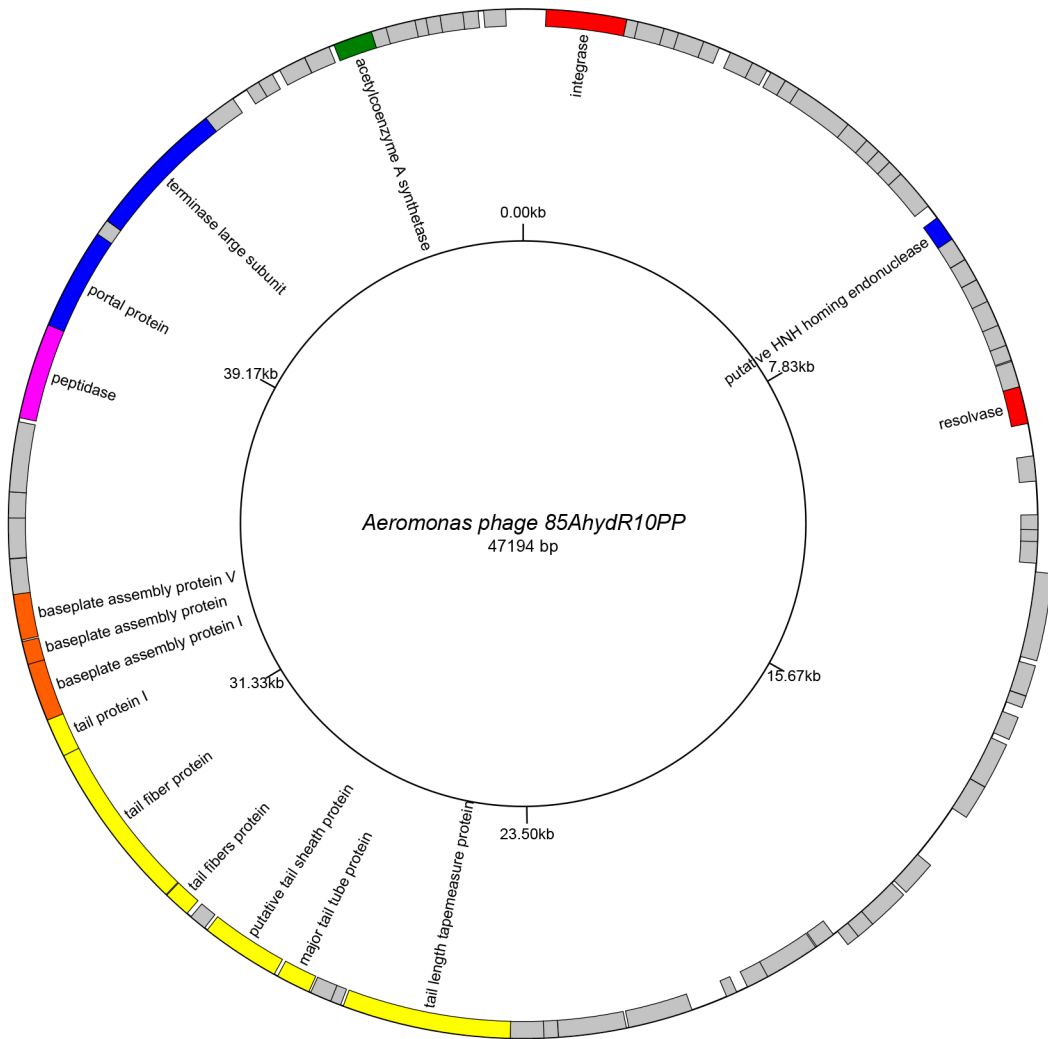

- ➔ DNA replication and modification
- ➔ Transcription regulation
- ➔ Structural and packaging
- ➔ Tail
- ➔ Host lysis
- ➔ Integrase/lysogenic
- ➔ Hypothetical protein
